# Supplementary material for: A palladium bio-nanocomposite as an efficient heterogeneous catalyst for nitro reduction: a fungus mediated green and sustainable process
Source: Royal Society of Chemistry journal article supplement (doi:10.1039/d6na00174b), 2026-05-28
Supplement: d6na00174b1.pdf [file d6na00174b1.pdf]

## Palladium Bio-Nanocomposite as an Efficient Heterogeneous Catalyst for Nitro Reduction: Fungus Mediated Green and Sustainable Process

Hemal B. Rathod, Amar G. Deshmukh, Yashasvi N. Desai, Paresh N. Patel\*

Laboratory of Bio-Organic Chemistry, Tarsadia Institute of Chemical Science (TICS), Uka Tarsadia University, Bardoli – 394350, Gujarat, India

### 1. Calculation of TON and TOF

➤ For each reaction, 0.005 g of AtPdNP (catalyst) is utilized for the 0.001 Mole nitro reduction. At the time of nanoparticle synthesis, 1 gram of AtPdNP (catalyst) Batch is prepared.

➤ The molecular weight of PdCl<sub>2</sub>, which is utilized as a metal precursor, is 177.33 g/mol, while the molecular weight of Pd alone is 106.42 g/mol.

1 M → 1000 mL distilled water → 106.42 g Pd

0.001 M → 1000 mL distilled water → ?(x) g Pd

$$x = \frac{0.001 M \times 106.42 g}{1 M}$$

x = 0.106 g Pd in 1000 mL 0.001 M solution

➤ 1 g of AtPdNP (catalyst) is prepared in a 500 mL 0.001 M PdCl<sub>2</sub> solution

0.001 M → 1000 mL distilled water → 0.106 g Pd

0.001 M → 500 mL distilled water → ?(y) g Pd

$$y = \frac{500 mL \times 0.106 g}{1000 mL}$$

y = 0.053 g Pd in 1 g AtPdNP

➤ A 1 g AtPdNP (catalyst) batch is prepared using 0.053 g Pd; only 0.005 g of AtPdNP (catalyst) is used in the reaction.

1 g AtPdNP → 0.053 g Pd

0.005 g AtPdNP → ?(z) g Pd

$$z = \frac{0.005 g \times 0.053 g}{1 g}$$

z = 0.000265 g Pd in 0.005 g AtPdNP

➤ Mole calculation of Pd in the reaction

106.42 g Pd → 1 Mole

0.000265 g Pd → ?(X) Mole

$$X = \frac{0.000265 g \times 1 Mole}{106.42 g}$$

X = 0.0000024 Mole Pd used in reaction

➤ Calculation of TON and TOF

$$TON = \frac{\text{Number of Moles of Reactant Conversion}}{\text{Moles of Catalyst Active Centres}}$$

$$TON = \frac{0.001 \text{ Mole}}{0.0000024 \text{ Mole}}$$

$$TON = 416.66$$

$$TOF = \frac{TON}{\text{Reaction Time in Hours}}$$

$$TOF = \frac{416.66}{0.5 \text{ hr}}$$

$$TOF = 833.32 \text{ hr}^{-1}$$

## 2. Zeta Size and Zeta Potential

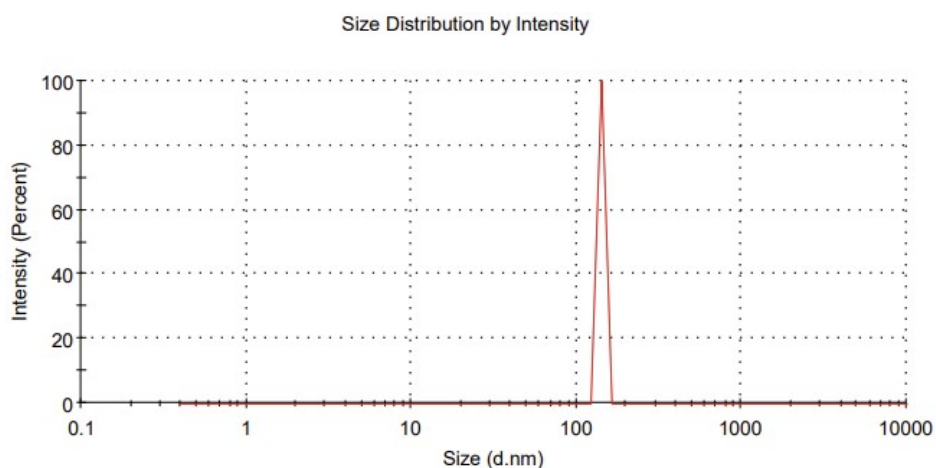

**Figure S1:** Zeta size for AtPdNP

**Table S1:**

Zeta size for AtPdNP

|                          |       |                | Size (d.nm) | % Intensity | St Dev (d.nm) |
|--------------------------|-------|----------------|-------------|-------------|---------------|
| <b>Z-Average (d.nm):</b> | 1452  | <b>Peak 1:</b> | 141.8       | 100.0       | 1.907e-6      |
| <b>Pdl:</b>              | 1.000 | <b>Peak 2:</b> | 0.000       | 0.0         | 0.000         |
| <b>Intercept:</b>        | 1.40  | <b>Peak 3:</b> | 0.000       | 0.0         | 0.000         |

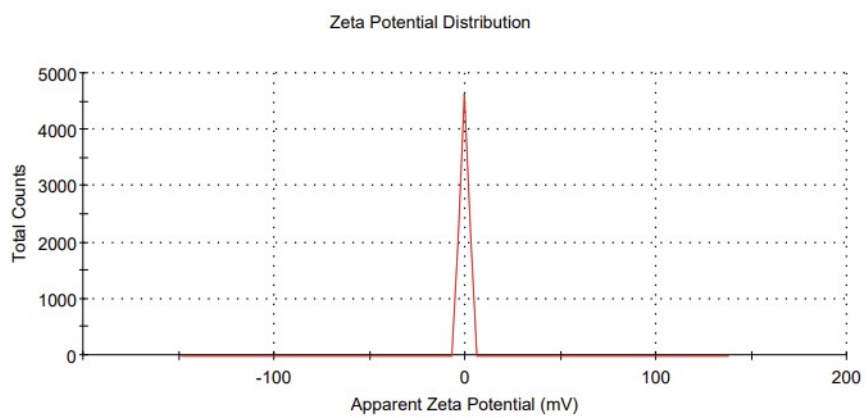

**Figure S2:** Zeta potential for AtPdNP

**Table S2:**

Zeta potential for AtPdNP

|                       |       |         | Mean (mV) | Area (%) | St Dev (mV) |
|-----------------------|-------|---------|-----------|----------|-------------|
| Zeta Potential (mV):  | 1452  | Peak 1: | 141.8     | 100.0    | 1.907e-6    |
| Zeta Deviation (mV):  | 1.000 | Peak 2: | 0.000     | 0.0      | 0.000       |
| Conductivity (mS/cm): | 1.40  | Peak 3: | 0.000     | 0.0      | 0.000       |

### 3. High-Performance Liquid Chromatography (HPLC)

Panel 1: Nitrobenzene

Chromatogram

mV

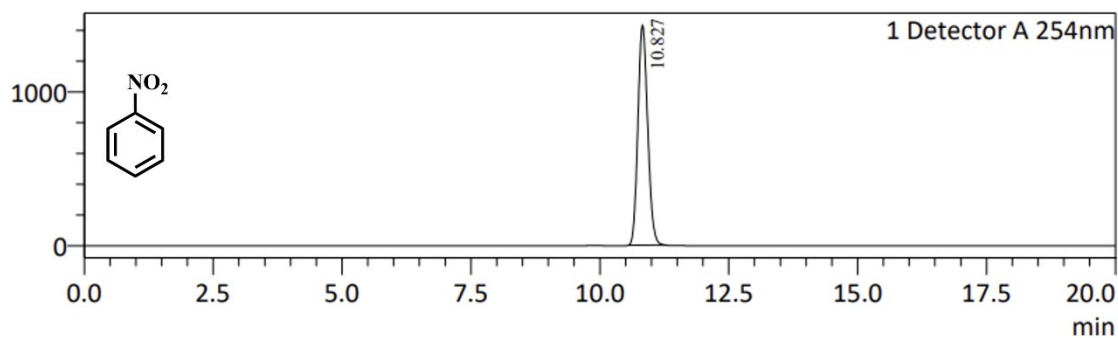

Panel 2: Aniline

Chromatogram

mV

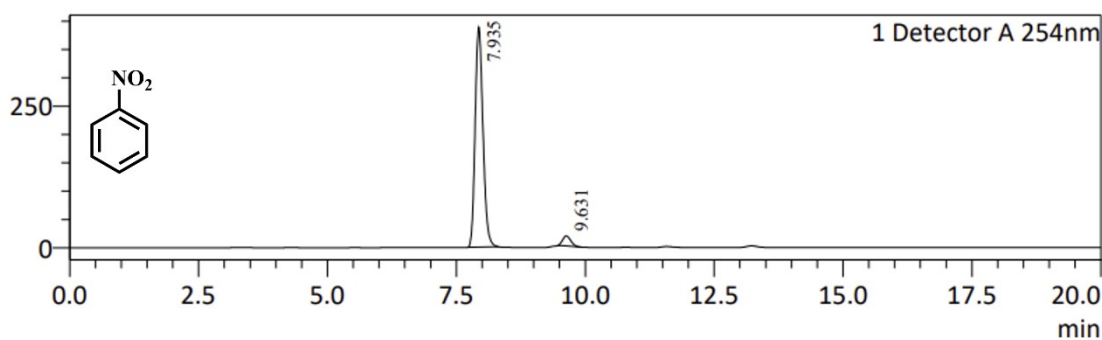

Panel 3: Synthesized Aniline

Chromatogram

mV

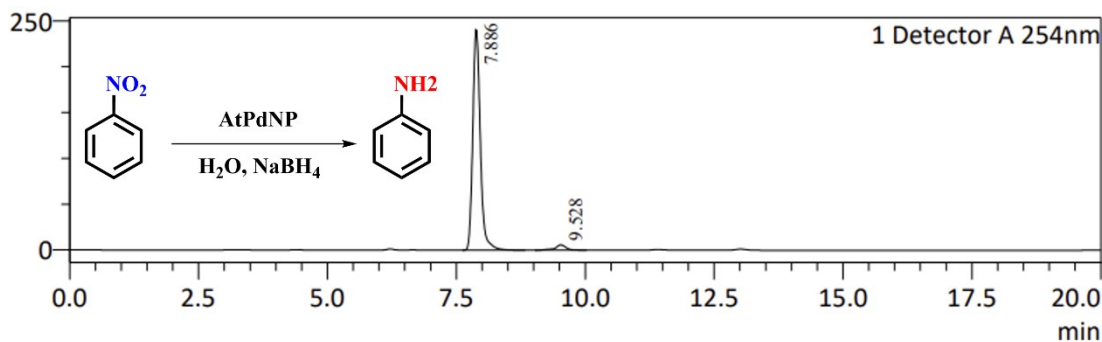

**Figure S3:** HPLC chromatogram of (Panel 1) standard reference nitrobenzene, (Panel 2) standard reference aniline, (Panel 3) synthesized aniline

**Table S3:**

| <b>Name</b>                                                          | <b>Peak#</b> | <b>Ret. Time</b> | <b>Area</b>     | <b>Area %</b> |
|----------------------------------------------------------------------|--------------|------------------|-----------------|---------------|
| <b>(Panel 1) HPLC Peak Table for Standard Reference Nitrobenzene</b> |              |                  |                 |               |
| Nitrobenzene                                                         | 1            | 10.827           | 18871343        | 100.00        |
| <b>Total</b>                                                         |              |                  | <b>18871343</b> | <b>100.00</b> |
| <b>(Panel 2) HPLC Peak Table for Standard Reference Aniline</b>      |              |                  |                 |               |
| Aniline                                                              | 1            | 7.935            | 4090000         | 95.449        |
| Impurity                                                             | 2            | 9.631            | 194997          | 4.551         |
| <b>Total</b>                                                         |              |                  | <b>4284997</b>  | <b>100.00</b> |
| <b>(Panel 3) HPLC Peak Table for Synthesized Aniline</b>             |              |                  |                 |               |
| Aniline                                                              | 1            | 7.886            | 2448607         | 96.746        |
| Impurity                                                             | 2            | 9.528            | 82351           | 3.254         |
| <b>Total</b>                                                         |              |                  | <b>2530958</b>  | <b>100.00</b> |

## ICP-OES

- A 1 g AtPdNP (catalyst) batch is prepared using 0.053 g Pd; only 0.050 g of AtPdNP (catalyst) is used in the sample preparation for ICP-OES in 5 mL of distilled water.

$$1 \text{ g AtPdNP} \rightarrow 0.053 \text{ g Pd}$$

$$0.050 \text{ g AtPdNP} \rightarrow ? (z) \text{ g Pd}$$

$$z = \frac{0.050 \text{ g} \times 0.053 \text{ g}}{1 \text{ g}}$$

$$z = 0.00265 \text{ g Pd in } 0.050 \text{ g AtPdNP}$$

**Table S4:** Comparison of AtPdNP catalyst performance with other known catalysts.

| <b>Entry</b> | <b>Catalyst</b>                                            | <b>Solvent</b>             | <b>Reducing Agent</b> | <b>Temp. °C</b> | <b>Time (min)</b> | <b>Yield (%)</b> | <b>Ref.</b> |
|--------------|------------------------------------------------------------|----------------------------|-----------------------|-----------------|-------------------|------------------|-------------|
| 1            | Pd@PANI                                                    | H <sub>2</sub> O           | NaBH <sub>4</sub>     | RT              | 240               | 92               | 1           |
| 2            | Pd@NP                                                      | H <sub>2</sub> O:<br>EtOH  | NaBH <sub>4</sub>     | RT              | 120               | -                | 2           |
| 3            | MNPs@PIL@AuNPs                                             | H <sub>2</sub> O           | NaBH <sub>4</sub>     | RT              | 70                | 96               | 3           |
| 4            | AuPd NPs                                                   | H <sub>2</sub> O           | NaBH <sub>4</sub>     | 60              | 180               | 99.4             | 4           |
| 5            | Bio-Pd                                                     | H <sub>2</sub> O           | NaBH <sub>4</sub>     | RT              | 60                | 95               | 5           |
| 6            | Pt/NaBH <sub>4</sub>                                       | EtOH                       | NaBH <sub>4</sub>     | RT              | 60                | 88.8             | 6           |
| 7            | CuNP/WS-1                                                  | H <sub>2</sub> O           | NaBH <sub>4</sub>     | 35              | 240               | 88               | 7           |
| 8            | Fe <sub>3</sub> O <sub>4</sub> @sepiolite-Pd <sup>2+</sup> | EtOH :<br>H <sub>2</sub> O | NaNH <sub>4</sub>     | 70              | 50                | 85               | 8           |
| 9            | AtPdNP                                                     | H <sub>2</sub> O           | NaBH <sub>4</sub>     | RT              | 30                | 98.80            | This Work   |

## Reference

1. Wang, G., Yuan, S., Wu, Z., Liu, W., Zhan, H., Liang, Y., ... & Bi, S. (2019). Ultra-low-loading palladium nanoparticles stabilized on nanocrystalline Polyaniline (Pd@PANI): a efficient, green, and recyclable catalyst for the reduction of nitroarenes. *Applied Organometallic Chemistry*, 33(11), e5159.
2. Mekkaoui, A. A., Jennane, S., Aberkouks, A., Boualy, B., Mehdi, A., Ait Ali, M., ... & El Houssame, S. (2019). Palladium nanoparticles supported on mesoporous natural phosphate: an efficient recyclable catalyst for nitroarene reduction. *Applied Organometallic Chemistry*, 33(10), e5117.
3. Moghaddam, F. M., Ayati, S. E., Firouzi, H. R., Hosseini, S. H., & Pourjavadi, A. (2017). Gold nanoparticles anchored onto the magnetic poly (ionic-liquid) polymer as robust and recoverable catalyst for reduction of Nitroarenes. *Applied Organometallic Chemistry*, 31(12), e3825.
4. de Souza, A. P. N., da Silva, G. F. S., CS Santos, E., de Gois, J. S., Mendoza, C. A. D., de Barros, S. D. T., ... & Senra, J. D. (2026). Eco-Friendly Synthesis of AuPd Bimetallic Nanoparticles Using *Alpinia zerumbet* for Efficient Reduction of Nitro Compounds. *ACS Omega*.
5. Xie, J., Egan-Morriss, C., Coker, V. S., Sullivan-Allsop, S., Cai, R., Haigh, S. J., & Lloyd, J. R. (2026). Microbial synthesis of bimetallic Pd–Rh and Pd–Pt nanoparticle catalysts. *Nanoscale Advances*.
6. Long, Y., Yuan, B., Niu, J., Tong, X., & Ma, J. (2015). Distinctive size effects of Pt nanoparticles immobilized on Fe<sub>3</sub>O<sub>4</sub>@PPy used as an efficient recyclable catalyst for benzylic alcohol aerobic oxidation and hydrogenation reduction of nitroaromatics. *New Journal of Chemistry*, 39(2), 1179-1185.
7. A. Zamani, A. Poursattar Marjani, A. Nikoo, M. Heidarpour, A. Dehghan, *Inorg. Nano-Metal Chem.* 2018, 48, 176.
8. Ghonchepour, E., Islami, M. R., Bananezhad, B., Mostafavi, H., & Tikdari, A. M. (2019). Synthesis of recoverable palladium composite as an efficient catalyst for the reduction of nitroarene compounds and Suzuki cross-coupling reactions using sepiolite clay and magnetic nanoparticles (Fe<sub>3</sub>O<sub>4</sub>@sepiolite-Pd<sup>2+</sup>). *Comptes Rendus. Chimie*, 22(1), 84-95.
